# Supplementary material
Source: publisher site journal article supplement (https://www.dovepress.com/article/314384)
Supplement: Supplementary file 1 [file get_supplementary_file.php]

**Supplementary Table 1: Number of patients with positive nodes, parametrium infiltration, LVSI and related recurrent rate.**

|  | **Variable** | | | | | | | |
| --- | --- | --- | --- | --- | --- | --- | --- | --- |
| **Positive Nodes** | | **PI** | | **LVSI** | | **DSI≥1/2** | |
| **+** | **-** | **+** | **-** | **+** | **-** | **+** | **-** |
| **n** | 443 | 1491 | 42 | 1892 | 942 | 992 | 1140 | 794 |
| **Recurrence, %** | 16.9% |  | 14.3% |  | 11.7% |  | 10.7% |  |

**Abbreviations:** PI, parametrium infiltration; LVSI, lymphovascular space invasion; DSI, deep stromal invasion.

**Supplementary Table 2. Survival of the group subdivided in type of adjuvant treatment and localization of recurrence.**

| **Subgroup** | **Survival** |
| --- | --- |
| **Adjuvant treatment** |  |
| Concurrent chemoradiotherapy | 37.5%±6.1% |
| Radiation | 33.6%±9.8% |
| Others | 51%±7.8% |
| **Localization of recurrence** |  |
| Central | 70.5%±7.9% |
| Pelvic | 32.3%±9.4% |
| *Distant LN* | 58.4%±10.8% |
| *Liver ± other sites* | 16.7%±15.2% |
| *Lung ± other sites* | 12.1%±11% |
| *Bone ± other sites* | 0 |
| *Peritoneum±other sites* | 58.3%±19.8% |
| *Lung only* | 36.8%±8.4% |
| Combined | 30%±12.8% |
